# Supplementary material
Source: PubMed Central journal article supplement (PMC9803856)
Supplement: mmc1.pdf [file mmc1.pdf]

## **Supplemental information**

### **Molecular basis for antiviral activity of two pediatric neutralizing antibodies targeting SARS-CoV-2 Spike RBD**

**Yaozong Chen, Jérémie Prévost, Irfan Ullah, Hugo Romero, Veronique Lisi, William D. Tolbert, Jonathan R. Grover, Shilei Ding, Shang Yu Gong, Guillaume Beaudoin-Bussi res, Romain Gasser, Mehdi Benlarbi, Dani V zina, Sai Priya Anand, Debashree Chatterjee, Guillaume Goyette, Michael W. Grunst, Ziwei Yang, Yuxia Bo, Fei Zhou, Kathie B land, Xiaoyun Bai, Allison R. Zeher, Rick K. Huang, Dung N. Nguyen, Rebekah Sherburn, Di Wu, Grzegorz Piszczek, Bastien Par , Doreen Matthies, Di Xia, Jonathan Richard, Priti Kumar, Walther Mothes, Marceline C t , Pradeep D. Uchil, Vincent-Philippe Lavall e, Martin A. Smith, Marzena Pazgier, Elie Haddad, and Andr s Finzi**

**Table S1. Summary of biolayer interferometry kinetic constants. Related to Table 1 and Figure S2C.**

| Analyte | Immobilized ligand   | Fitting mode | $k_a$ (M <sup>-1</sup> s <sup>-1</sup> ) | $k_d$ (s <sup>-1</sup> ) | K <sub>D</sub> (pM) | K <sub>D</sub> reduction fold compared to RBD <sub>WT</sub> |
|---------|----------------------|--------------|------------------------------------------|--------------------------|---------------------|-------------------------------------------------------------|
| EH3 IgG | RBD <sub>WT</sub>    | 1:1          | 1.01 x 10 <sup>5</sup>                   | 6.09 x 10 <sup>-7</sup>  | 6.06                | 1                                                           |
|         | RBD <sub>E484K</sub> | 1:1          | 1.11 x 10 <sup>5</sup>                   | 4.46 x 10 <sup>-7</sup>  | 4.04                | 0.67                                                        |
| EH8 IgG | RBD <sub>WT</sub>    | 1:1          | 2.11 x 10 <sup>5</sup>                   | 3.55 x 10 <sup>-7</sup>  | 1.68                | 1                                                           |
|         | RBD <sub>E484K</sub> | 1:1          | 1.83 x 10 <sup>5</sup>                   | 6.01 x 10 <sup>-7</sup>  | 3.29                | 1.96                                                        |

**Table S2. Data collection and model refinement statistics. Related to Figure 3.**

|                                                             | <b>EH3-RBD</b>                    | <b>EH8-RBD</b>                    |
|-------------------------------------------------------------|-----------------------------------|-----------------------------------|
| <b>Data collection</b>                                      |                                   |                                   |
| Wavelength, Å                                               | 0.979                             | 0.979                             |
| Resolution range, Å                                         | 34.38 - 2.65 (2.745 - 2.65)       | 46.91 - 2.49 (2.58 - 2.49)        |
| Space group                                                 | P 2 <sub>1</sub> 2 2 <sub>1</sub> | P 2 <sub>1</sub> 2 2 <sub>1</sub> |
| Unit cell parameter                                         |                                   |                                   |
| a, b, c, Å                                                  | 86.7, 103.1, 112.3                | 81.8, 100.7, 106.0                |
| α, β, γ, °                                                  | 90.0, 90.0, 90.0                  | 90.0, 90.0, 90.0                  |
| Redundancy                                                  | 6.6                               | 18.8                              |
| Completeness, %                                             | 99.21 (98.85)                     | 99.20 (92.82)                     |
| Mean I/sigma(I)                                             | 10.37 (2.28)                      | 30.40 (2.67)                      |
| R <sub>merge</sub> <sup>a</sup>                             | 0.190 (0.720)                     | 0.144 (1.037)                     |
| R <sub>pim</sub> <sup>b</sup>                               | 0.079 (0.301)                     | 0.034 (0.259)                     |
| CC <sub>1/2</sub> <sup>c</sup>                              | 0.933 (0.772)                     | 0.996 (0.877)                     |
| Wilson B <sub>factor</sub> <sup>d</sup> (1/Å <sup>2</sup> ) | 39.62                             | 57.01                             |
| <b>Refinement</b>                                           |                                   |                                   |
| R <sub>work</sub> <sup>e</sup>                              | 0.179 (0.245)                     | 0.244 (0.425)                     |
| R <sub>free</sub> <sup>f</sup>                              | 0.221 (0.305)                     | 0.270 (0.431)                     |
| Resolution, Å                                               | 34.38 - 2.65                      | 46.91 - 2.49                      |
| # of non-hydrogen atoms                                     |                                   |                                   |
| proteins                                                    | 4968                              | 4829                              |
| ligands                                                     |                                   |                                   |
| water                                                       | 144                               | 102                               |
| Overall B <sub>factor</sub> <sup>g</sup> (Å <sup>2</sup> )  |                                   |                                   |
| proteins                                                    | 45.13                             | 62.54                             |
| ligands                                                     | 99.79                             | 96.86                             |
| water                                                       | 42.48                             | 49.96                             |
| RMS (bond lengths), Å                                       | 0.004                             | 0.005                             |
| RMS (bond angles), °                                        | 0.74                              | 0.89                              |
| Ramachandran <sup>g</sup>                                   |                                   |                                   |
| Favored, %                                                  | 97.11                             | 96.96                             |
| Allowed, %                                                  | 2.73                              | 3.04                              |
| Outliers, %                                                 | 0.16                              | 0.00                              |
| PDB ID                                                      | 7UL1                              | 7UL0                              |

Statistics for the highest-resolution shell are shown in parentheses.

<sup>a</sup>R<sub>merge</sub> =  $\sum |I - \langle I \rangle| / \sum I$ , where  $I$  is the observed intensity and  $\langle I \rangle$  is the average intensity obtained from multiple observations of symmetry-related reflections after rejections

<sup>b</sup>R<sub>pim</sub> = as defined in [45].

<sup>c</sup>CC<sub>1/2</sub> = as defined by Karplus and Diederichs [46]

<sup>d</sup>Wilson B<sub>factor</sub> as calculated in [47]

<sup>e</sup>R =  $\sum \|F_o| - |F_c\| / \sum |F_o|$ , where  $F_o$  and  $F_c$  are the observed and calculated structure factors, respectively.

<sup>f</sup>R<sub>free</sub> = as defined by Brünger [48]

<sup>g</sup>Calculated with MolProbity [49].

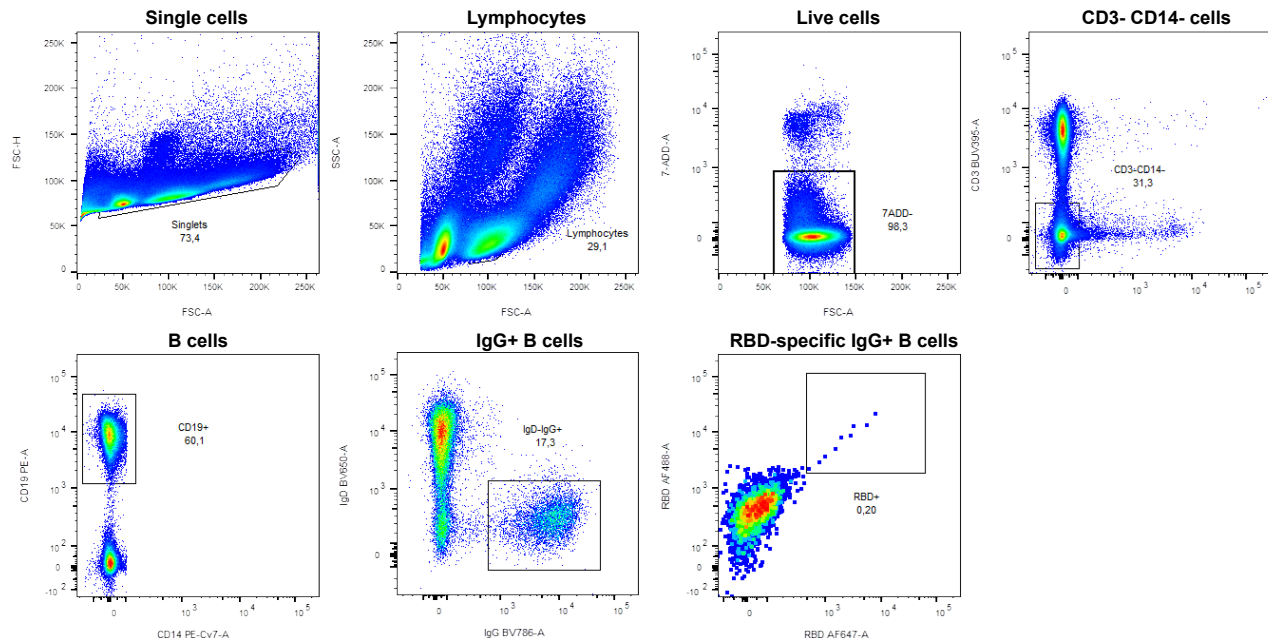

**Figure S1. Gating strategy for the isolation of RBD-specific mAbs. Related to Figure 1.**

Flow cytometry gates to identify RBD-specific B cells from PBMCs of a pediatric patient (Patient 12). RBD-specific B cells were identified according to cell morphology by light-scatter parameters and excluding doublets cells while gating on live cells (7-AAD<sup>-</sup>). Cells were then gated based on lineage markers: CD3<sup>-</sup> (T cell marker), CD14<sup>-</sup> (monocyte marker) and CD19<sup>+</sup> (B cell marker). Cells were further gated for isotypic expression: IgD<sup>-</sup> (naïve) and IgG<sup>+</sup> (class-switched). Finally, RBD-specific IgG<sup>+</sup> B cells were identified using a dual staining with fluorescent RBD probes (RBD-AF647 and RBD-AF488). The nine RBD-specific B cells were sorted as single cells to clone their BCR sequence.

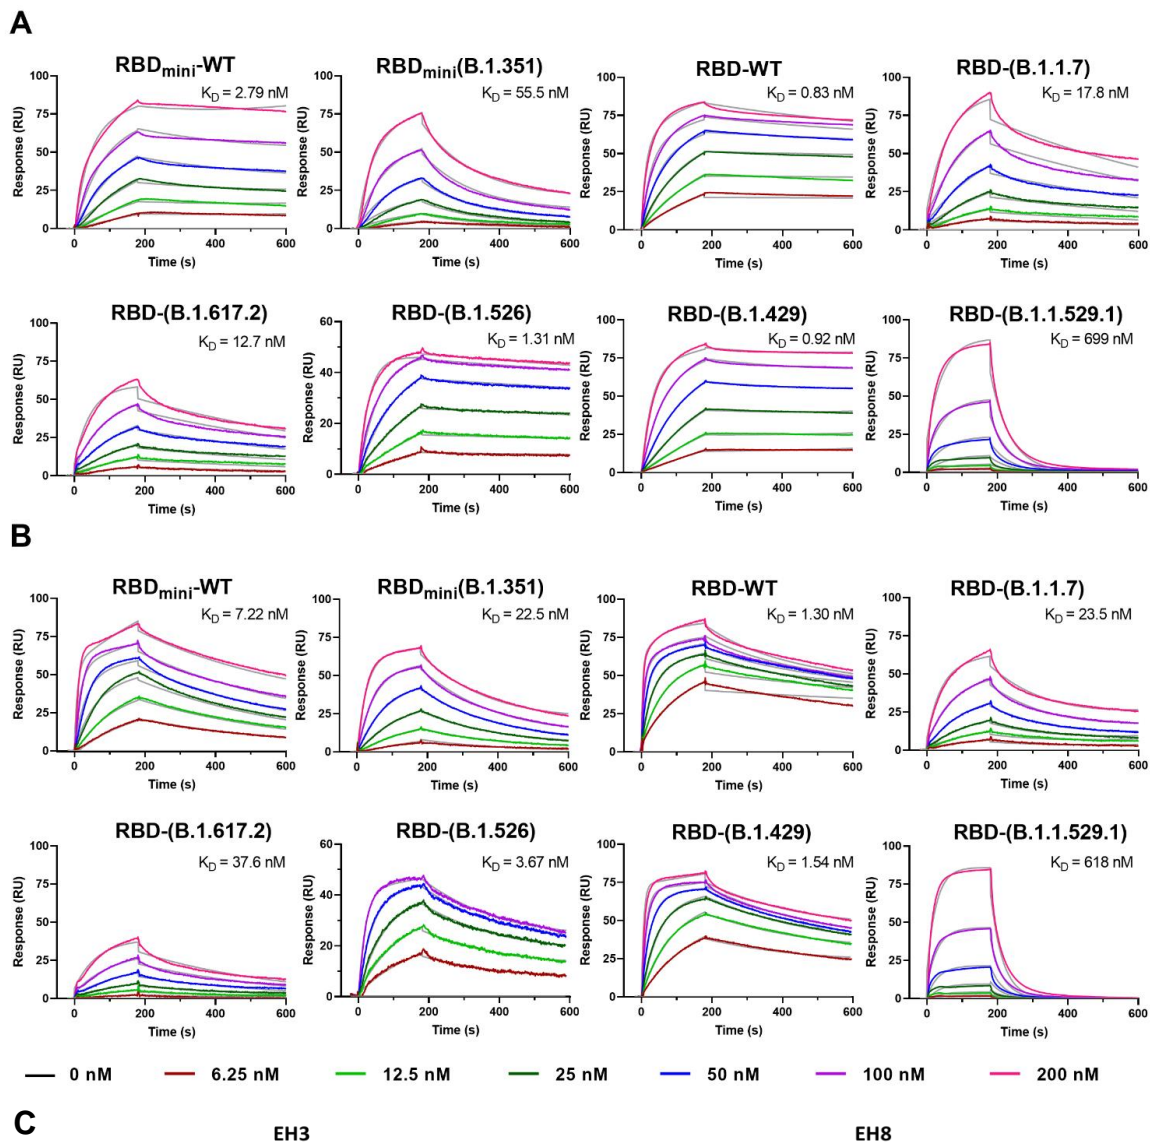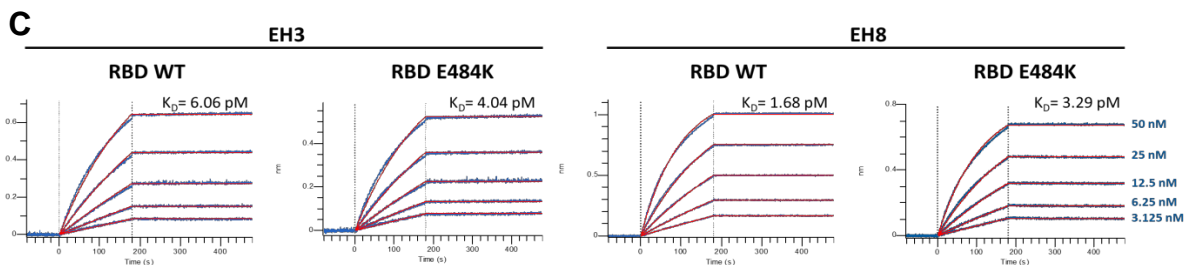

**Figure S2. Binding affinity of RBDs of SARS-CoV-2 VOCs to EH3 and EH8. Related to Table 1.**  
**(A-B)** SPR kinetic measurement of SARS-CoV-2 RBDs binding to immobilized **(A)** EH3 IgG and **(B)** EH8 IgG. Either IgGs (~250-350 RU) were immobilized on a Protein A chip and 2-fold dilutions of SARS-CoV-2 RBDs of WT and 6 VOCs (6.25-200nM) were injected as flow analytes. The experimental sensorgrams are colored in indicated colors and the 1:1 Langmuir fitting are in grey. RBD<sub>mini</sub> is the segment of residue 329-527 and otherwise are residue 319-537. The detailed SPR kinetic constants are listed in **Table 1**. **(C)** Binding kinetics between SARS-CoV-2 RBD (WT or E484K) and EH3 or EH8 mAbs assessed by biolayer interferometry. Biosensors loaded with RBD proteins were soaked in two-fold dilution series of indicated mAbs (50 nM–3.125 nM) at 25°C. Raw data are shown in blue and 1:1 binding model is shown in red. The detailed biolayer interferometry kinetic constants are listed in **Table S1**.

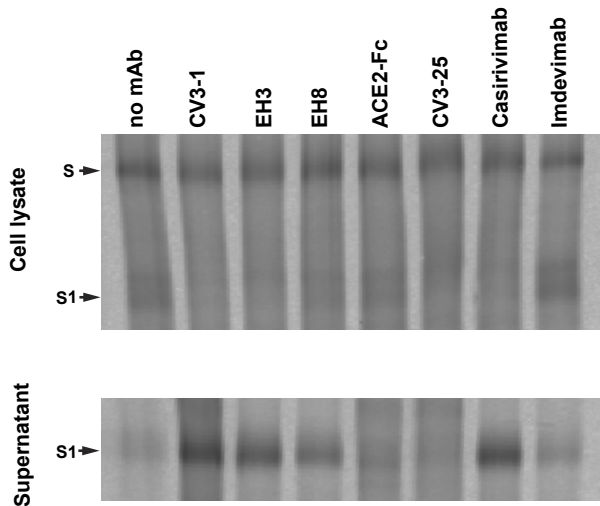

**Figure S3. The ability of RBD-specific mAbs to induce S1 shedding is epitope-dependent. Related to Figure 4.**

S1 shedding was evaluated by transfection of 293T cells to express SARS-CoV-2 S D614G followed by radiolabeling using  $^{35}\text{S}$ -methionine/cysteine mix in presence of RBD-specific mAbs (CV3-1, EH3, EH8), ACE2-Fc, S2-specific CV3-25, or two FDA-approved RBD-specific mAbs (Casirivimab and Imdevimab). This was followed by immunoprecipitation of cell lysates and supernatant with CV3-25 and a rabbit antiserum raised against SARS-CoV-2 RBD produced in-house. Samples were analyzed by SDS-PAGE and autoradiography.

A

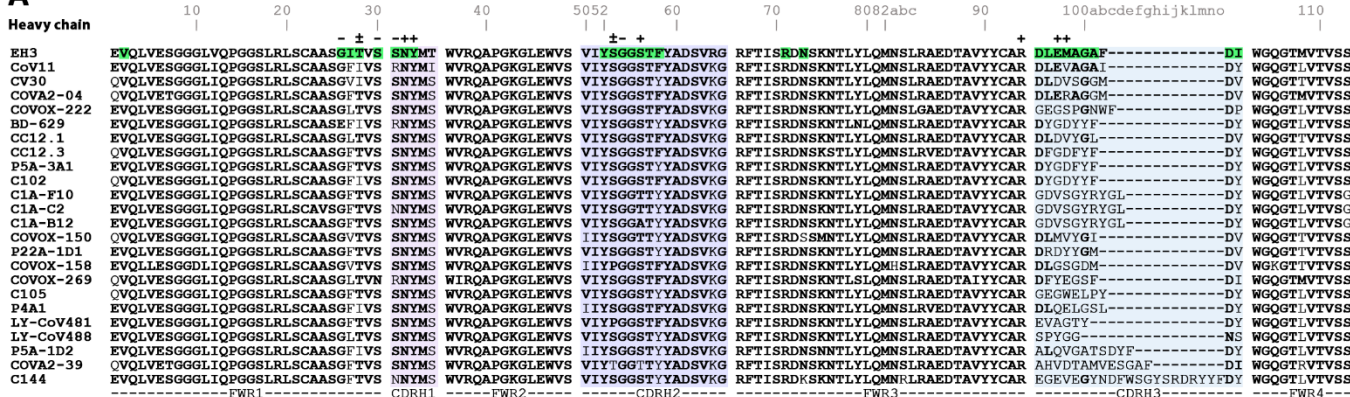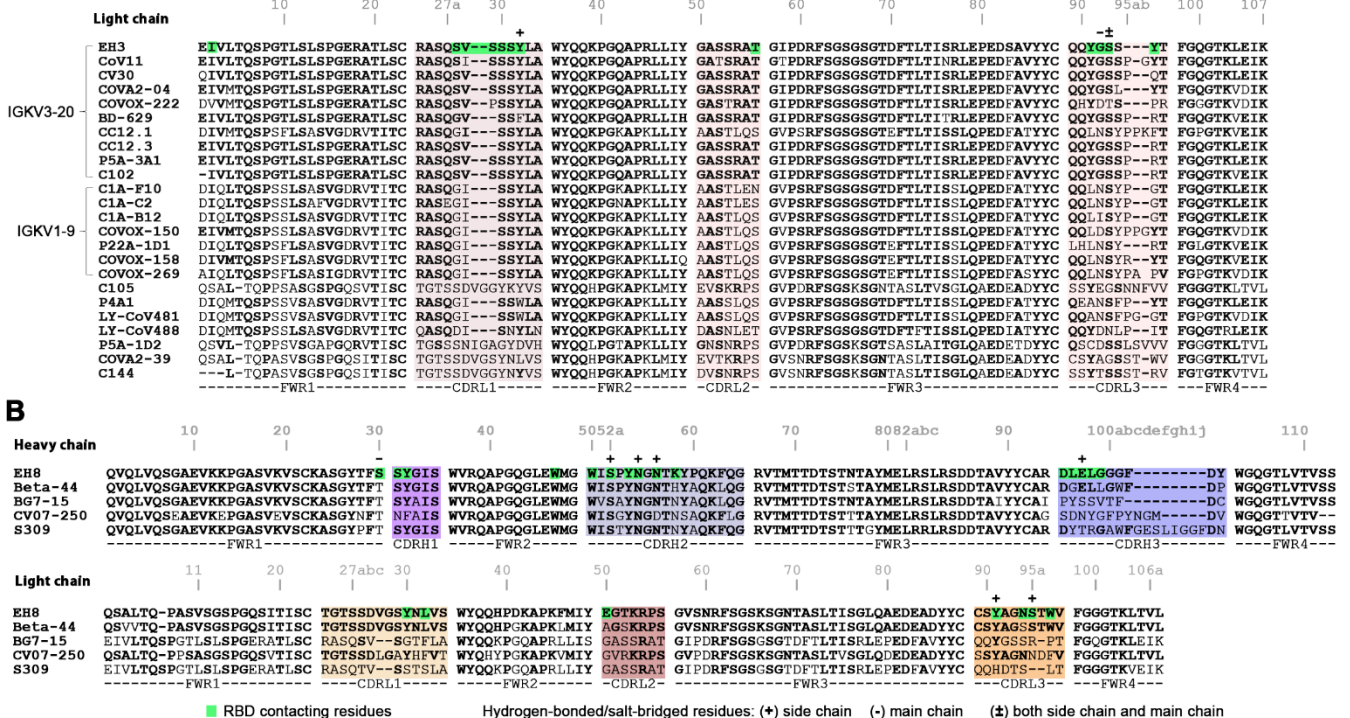

**Figure S4. V<sub>H</sub> and V<sub>L</sub> sequence alignments of EH3 and EH8 to other structurally available RBD-specific mAbs. Related to Figure 4.**

(A) Alignments of EH3 and other 23 IGHV3-53 encoded Abs. (B) Alignments of EH8 and other 4 IGHV1-18 Abs. The RBD-contacting residues (BSA>0) in EH3-RBD and EH8-RBD crystal structures are shaded in green. Residues involved in salt-bridges or H-bonds to the RBD are marked above the sequence with (+) for the side chain, (-) for the main chain and (±) for both.
